# Supplementary material for: Increased phosphorus availability mitigates the inhibition of nitrogen deposition on CH 4 uptake in an old-growth tropical forest, southern China
Source: Copernicus journal article supplement (doi:10.5194/bg-8-2805-2011), 2011-09-29
Supplement: Supplementary file 1 [file bg-8-2805-2011-supplement.pdf]

1 **Supplementary Material**

2 **S1.** Linear fitting of GHGs (greenhouse gases) concentrations in the enclosure chambers  
3 against time. Measured in the pre-experiment in October 2006. The GHG  
4 concentrations remained linear for up to 100 min after the chamber was closed in our  
5 sampling.

6

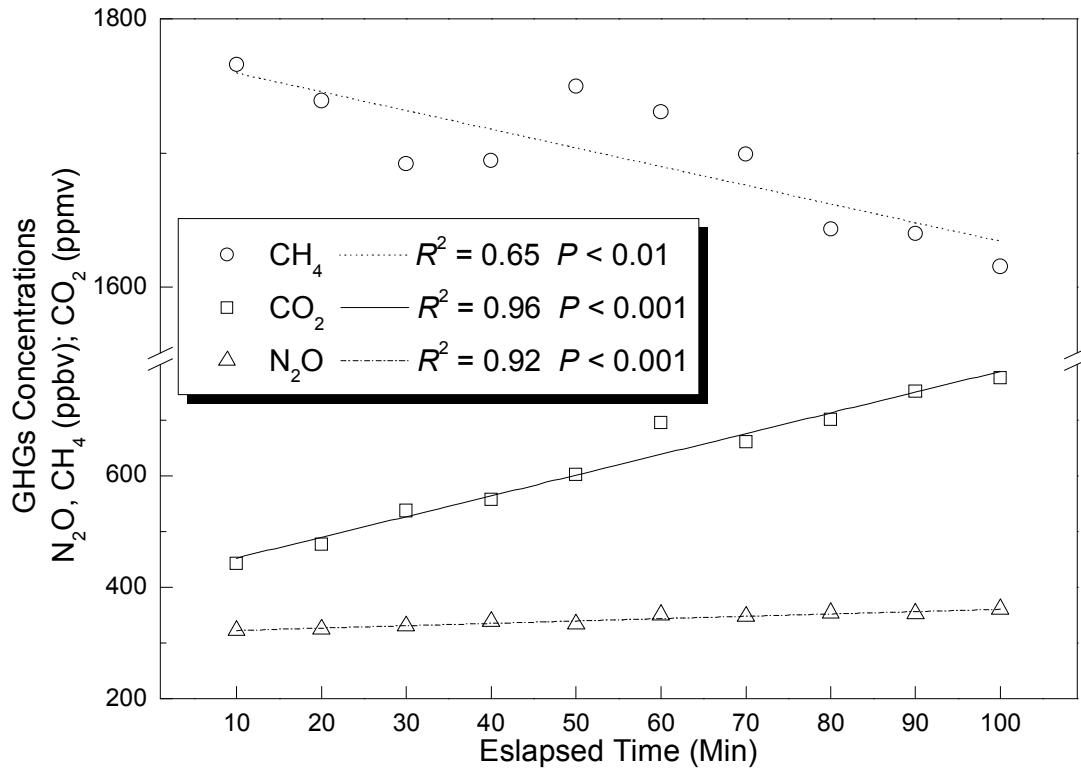

7

1 **S2.** Results (*p*-value) of two-way ANOVA on the effects of Nitrogen (N), Phosphorus (P) and their interactions on the soil fluxes of CH<sub>4</sub>, N<sub>2</sub>O,  
 2 and CO<sub>2</sub>. Spring from April to June, summer from July to September, fall from October to December, winter from January to March.

| CH <sub>4</sub> | 2007   |        |       |        | 2008   |        |       |        | 2009   |        |
|-----------------|--------|--------|-------|--------|--------|--------|-------|--------|--------|--------|
|                 | Spring | Summer | Fall  | Winter | Spring | Summer | Fall  | Winter | Spring | Summer |
| N               | 0.403  | 0.157  | 0.055 | 0.199  | 0.026  | 0.211  | 0.077 | 0.111  | 0.021  | 0.028  |
| P               | 0.109  | 0.004  | 0.018 | 0.011  | 0.024  | 0.014  | 0.068 | 0.101  | 0.020  | 0.013  |
| N×P             | 0.363  | 0.130  | 0.318 | 0.112  | 0.400  | 0.524  | 0.813 | 0.363  | 0.384  | 0.808  |

3
